# Supplementary material for: Ion channels in sulfonated copolymer-grafted nanoparticles in ionic liquids
Source: Royal Society of Chemistry journal article supplement (doi:10.1039/d2sm00725h), 2022-01-01
Supplement: d2sm00725h1.pdf [file d2sm00725h1.pdf]

## Supporting Information

### Ion Channels in Sulfonated Copolymer-Grafted Nanoparticles in Ionic Liquid

Ruhao Li, Yuke Han and Pinar Akcora

1 Castle Point on Hudson, Department of Chemical Engineering and Materials Science, McLean  
Hall, Stevens Institute of Technology, Hoboken, NJ 07030 USA

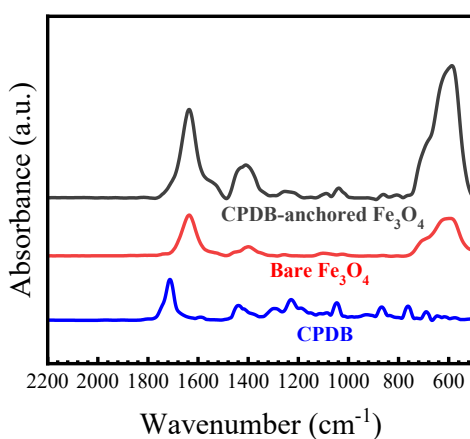

**Figure S1** | FTIR spectra of bare Fe<sub>3</sub>O<sub>4</sub>, CPDB-anchored Fe<sub>3</sub>O<sub>4</sub> and CPDB.

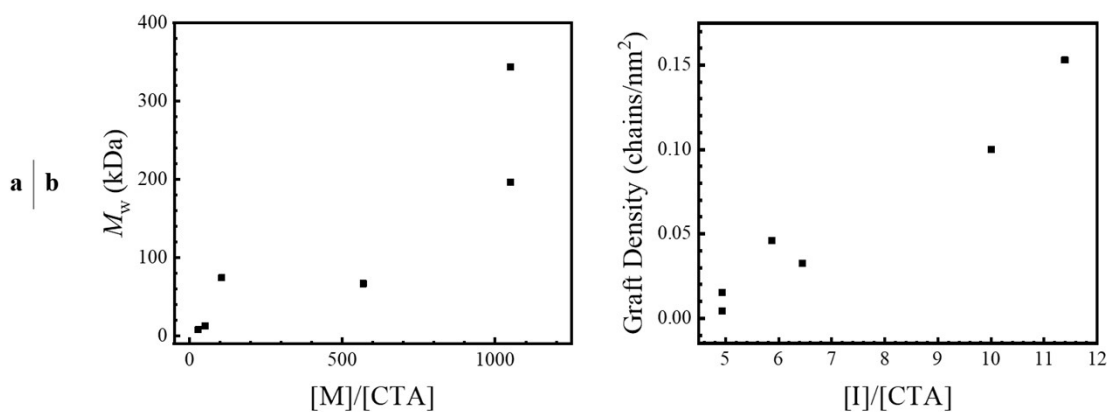

**Figure S2** | (a) Weight-averaged molecular weight of PMMA dependence on monomer and CTA molar ratio. (b) Graft density changes with initiator and CTA molar ratio.

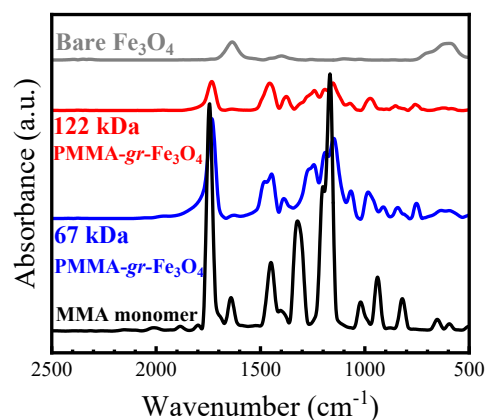

**Figure S3** | FTIR spectra of PMMA-*gr*-Fe<sub>3</sub>O<sub>4</sub>, bare Fe<sub>3</sub>O<sub>4</sub> and MMA monomer.

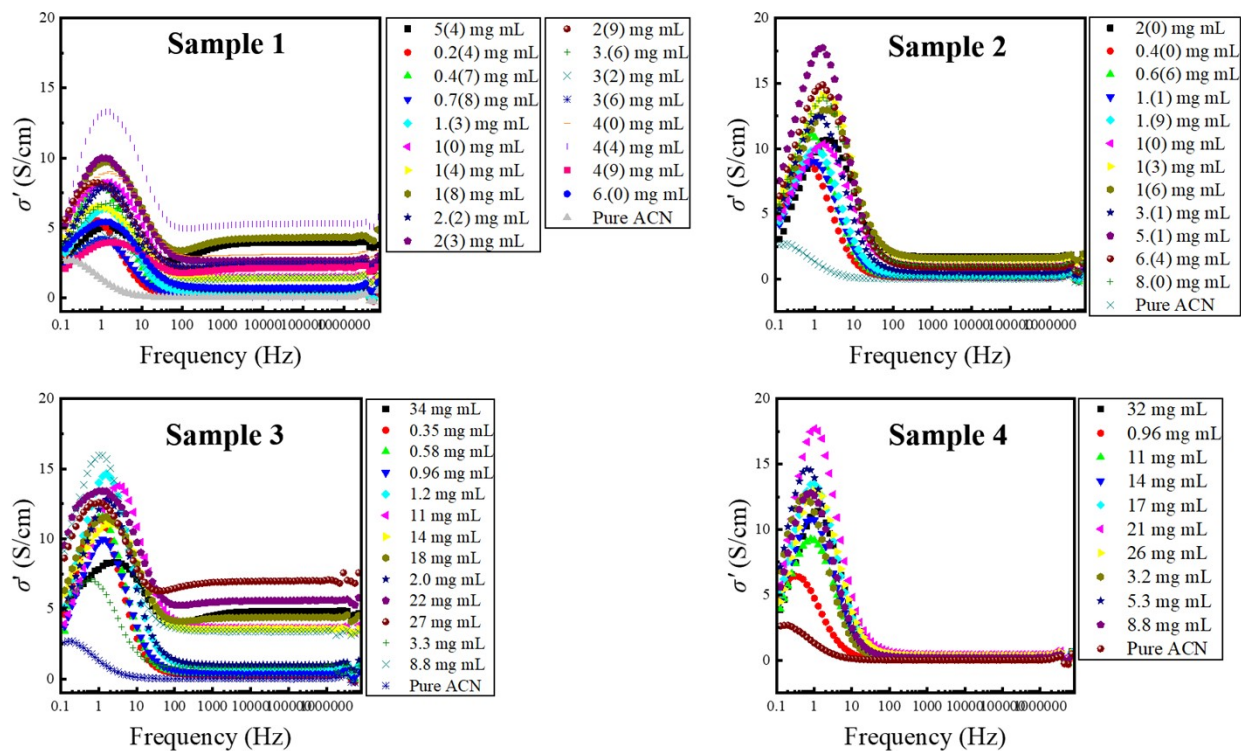

**Figure S4** | Frequency dependence of bulk conductivity of grafted nanoparticles in acetonitrile for different concentrations.

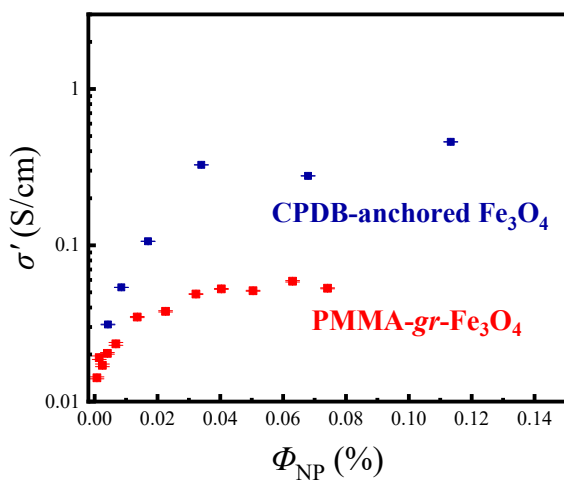

**Figure S5** | Ionic conductivity of acetonitrile with PMMA-*gr*-Fe<sub>3</sub>O<sub>4</sub> and CPDB-anchored Fe<sub>3</sub>O<sub>4</sub> at different particle loadings  $\phi_{NP}$ .

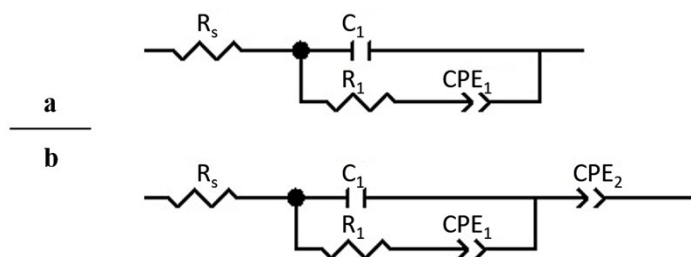

**Figure S6** | Two equivalent circuit models are selected to fit the Nyquist plots of copolymer-grafted NP in acetonitrile. Model **a** is suitable for samples with  $\sigma' < \sim 1 \text{ S/cm}$ , and model **b** is suitable for  $\sigma' > 1 \text{ S/cm}$ .

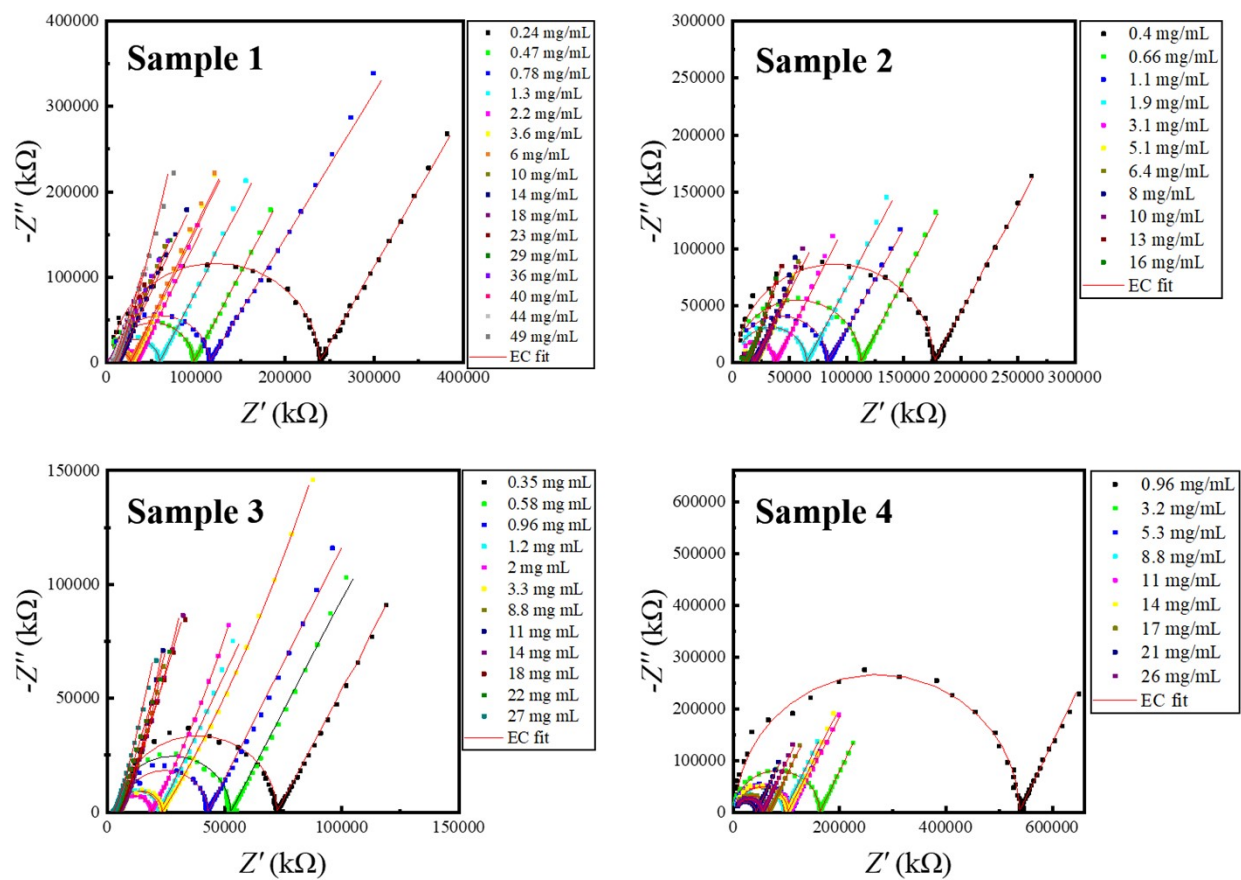

**Figure S7** | Nyquist plots of grafted nanoparticles in acetonitrile with the EC model fittings.

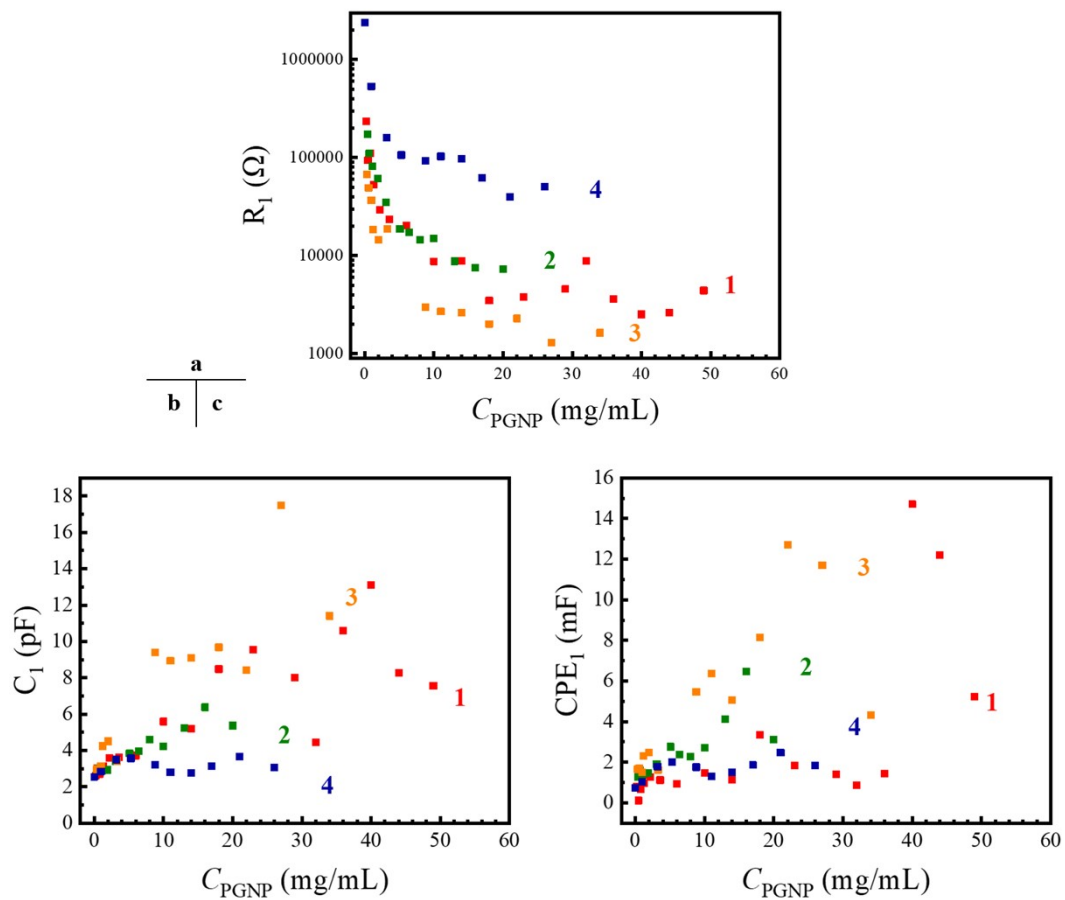

**Figure S8** | The values of circuit elements **(a)**  $R_1$ , **(b)**  $C_1$ , and **(c)**  $CPE_1$  versus the mass concentration of polymer-grafted nanoparticles ( $C_{PGNP}$ ).

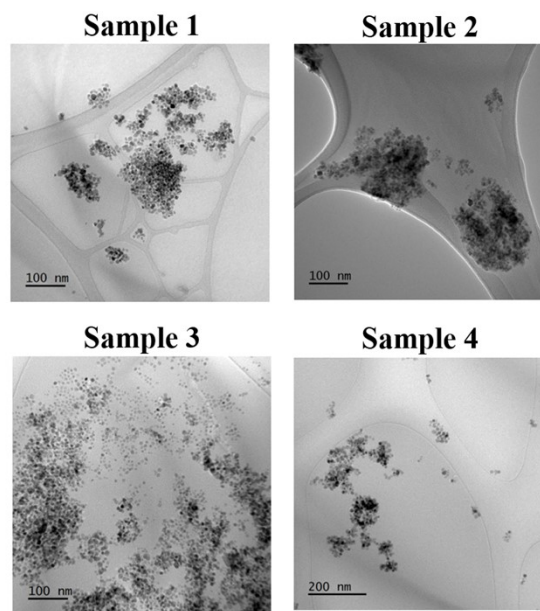

**Figure S9** | TEM images of PSSTOA-*b*-PMMA-grafted nanoparticles in HMIm-TFSI.

**Table S1** | The area integrated for PSSTOA and PMMA peaks of  $^1\text{H}$  NMR spectra of copolymer-grafted NPs (Samples 1-4) and the calculated SS%.

| Sample | $A_{PSSTOA}$ | $A_{PMMA}$ | SS%  |
|--------|--------------|------------|------|
| 1      | 487.95       | 11358.81   | 6.0  |
| 2      | 122.86       | 1772.21    | 9.4  |
| 3      | 208.60       | 2578.70    | 10.8 |
| 4      | 316.00       | 9274.28    | 4.9  |

**Table S2** | Initiator, CTA, SSTOA amounts used in synthesis of PMMA-*b*-PSS-grafted NPs.

| Sample | Initiator amount<br>( $\mu\text{mol}$ ) | Calculated CTA amount<br>( $\mu\text{mol}$ ) | SSTOA amount<br>(mmol) | $\bar{D}P_{w, PSSTOA}$ |
|--------|-----------------------------------------|----------------------------------------------|------------------------|------------------------|
| 1      | 17.47                                   | 63.41                                        | 17.50                  | 43                     |
| 2      | 16.17                                   | 38.26                                        | 5.41                   | 70                     |
| 3      | 7.18                                    | 26.03                                        | 7.30                   | 81                     |
| 4      | 7.17                                    | 10.00                                        | 6.66                   | 62                     |

**Table S3** | The parameters of the power-law fitting to the conductivity data.

| Sample | $\phi_c$ (vol %) | $t$   | $R^2$ |
|--------|------------------|-------|-------|
| 1      | 0.001            | 0.611 | 0.780 |
| 2      | 0.001            | 0.641 | 0.956 |
| 3      | 0.001            | 0.573 | 0.889 |
| 4      | 0.001            | 0.542 | 0.670 |

**Table S4** | Values of EC components of Sample 1.

| $C_{PGNP}$ (mg/mL) | $\chi^2$  | $R_s$ ( $\Omega$ ) | $C_1$ (pF) | $R_1$ ( $\Omega$ ) | $CPE_{1-T}$ (mF) | $CPE_{1-P}$ | $CPE_{2-T}$ (mF) | $CPE_{2-P}$ |
|--------------------|-----------|--------------------|------------|--------------------|------------------|-------------|------------------|-------------|
| 0                  | 0.017947  | 5883               | 2.55       | 2.39E+06           | 72.7             | 0.66394     |                  |             |
| 0.24               | 0.0037513 | 5516               | 2.61       | 2.33E+05           | 80.0             | 0.67915     |                  |             |
| 0.47               | 0.0026422 | 3277               | 3.03       | 93966              | 11.6             | 0.70218     |                  |             |
| 0.78               | 0.0025518 | 5457               | 2.71       | 1.10E+05           | 65.6             | 0.66298     |                  |             |
| 1.3                | 0.002636  | 5870               | 3.15       | 53228              | 97.7             | 0.70909     |                  |             |
| 2.2                | 0.0021688 | 4701               | 3.58       | 29398              | 128              | 0.72406     |                  |             |
| 3.6                | 0.0013154 | 5688               | 3.62       | 23341              | 112              | 0.72598     |                  |             |
| 6                  | 0.0013296 | 6421               | 3.72       | 20386              | 93.3             | 0.72549     |                  |             |

|    |            |       |      |      |      |         |      |         |
|----|------------|-------|------|------|------|---------|------|---------|
| 10 | 0.0010332  | 3940  | 5.59 | 8735 | 148  | 0.748   |      |         |
| 14 | 0.0011003  | 4585  | 5.20 | 8857 | 114  | 0.73502 |      |         |
| 18 | 0.00050303 | 786.8 | 8.48 | 3471 | 334  | 0.66779 | 311  | 1.032   |
| 23 | 0.00086537 | 3249  | 9.54 | 3779 | 184  | 0.74971 |      |         |
| 29 | 0.00092738 | 3871  | 8.01 | 4554 | 141  | 0.73715 |      |         |
| 32 | 0.0024702  | 4180  | 4.46 | 8816 | 86.9 | 0.69504 |      |         |
| 36 | 0.0011353  | 4155  | 10.6 | 3610 | 143  | 0.73365 |      |         |
| 40 | 0.00032584 | 3402  | 13.1 | 2517 | 1470 | 0.53002 | 175  | 0.86382 |
| 44 | 0.000204   | 856.9 | 8.28 | 2613 | 1220 | 0.60747 | 293  | 0.87923 |
| 49 | 0.00058418 | 4132  | 7.56 | 4398 | 522  | 0.55132 | 8.28 | 0.9243  |

**Table S5** | Values of EC components of Sample 2.

| $C_{PGNP}$ (mg/<br>mL) | $\chi^2$   | $R_s$<br>( $\Omega$ ) | $C_1$<br>(pF) | $R_1$<br>( $\Omega$ ) | $CPE_{1-T}$<br>(mF) | $CPE_{1-P}$ | $CPE_{2-T}$<br>(mF) | $CPE_{2-P}$ |
|------------------------|------------|-----------------------|---------------|-----------------------|---------------------|-------------|---------------------|-------------|
| 0                      | 0.017947   | 5883                  | 2.55          | 2.39E+06              | 72.7                | 0.66394     |                     |             |
| 0.4                    | 0.0032679  | 3511                  | 2.92          | 1.73E+05              | 129                 | 0.68859     |                     |             |
| 0.66                   | 0.0015355  | 2677                  | 3.02          | 1.10E+05              | 160                 | 0.69464     |                     |             |
| 1.1                    | 0.0016277  | 2010                  | 2.89          | 81334                 | 137                 | 0.66933     |                     |             |
| 1.9                    | 0.0017106  | 3590                  | 2.93          | 61337                 | 147                 | 0.69126     |                     |             |
| 3.1                    | 0.0013115  | 2963                  | 3.40          | 34785                 | 191                 | 0.70235     |                     |             |
| 5.1                    | 0.0011114  | 2205                  | 3.84          | 18746                 | 276                 | 0.71753     |                     |             |
| 6.4                    | 0.001178   | 3284                  | 3.95          | 17282                 | 238                 | 0.71543     |                     |             |
| 8                      | 0.001432   | 3877                  | 4.60          | 14586                 | 228                 | 0.72083     |                     |             |
| 10                     | 0.00030381 | 4306                  | 4.22          | 14977                 | 270                 | 0.64103     | 294                 | 1.069       |
| 13                     | 0.00018887 | 3500                  | 5.23          | 8760                  | 411                 | 0.65043     | 372                 | 1.05        |
| 16                     | 0.00015083 | 3958                  | 6.38          | 7511                  | 647                 | 0.59391     | 265                 | 0.95154     |
| 20                     | 0.00029378 | 3403                  | 5.37          | 7320                  | 311                 | 0.64216     | 257                 | 1.173       |



**Table S6** | Values of EC components of Sample 3.

| $C_{PGNP}$ (mg/mL) | $\chi^2$   | $R_s$ ( $\Omega$ ) | $C_1$ (pF) | $R_1$ ( $\Omega$ ) | $CPE_{1-T}$ (mF) | $CPE_{1-P}$ | $CPE_{2-T}$ (mF) | $CPE_{2-P}$ |
|--------------------|------------|--------------------|------------|--------------------|------------------|-------------|------------------|-------------|
| 0                  | 0.017947   | 5883               | 2.55       | 2.39E+06           | 72.7             | 0.66394     |                  |             |
| 0.35               | 0.0054907  | 5085               | 2.97       | 67173              | 166              | 0.69532     |                  |             |
| 0.58               | 0.0017064  | 3360               | 2.94       | 49180              | 171              | 0.70156     |                  |             |
| 0.96               | 0.0058244  | 6145               | 3.15       | 36697              | 150              | 0.70924     |                  |             |
| 1.2                | 0.002974   | 3842               | 4.24       | 18330              | 230              | 0.72547     |                  |             |
| 2                  | 0.00040854 | 4229               | 4.51       | 14410              | 249              | 0.69042     | 441              | 1.319       |
| 3.3                | 0.00080955 | 4564               | 3.42       | 18726              | 162              | 0.64935     | 215              | 1.215       |
| 8.8                | 0.00018016 | 2492               | 9.39       | 2969               | 546              | 0.68085     | 416              | 1.091       |
| 11                 | 0.00037406 | 2351               | 8.93       | 2690               | 636              | 0.65377     | 315              | 1.047       |
| 14                 | 0.00028806 | 2558               | 9.09       | 2601               | 507              | 0.65998     | 293              | 0.99973     |
| 18                 | 0.00046589 | 2172               | 9.68       | 2002               | 813              | 0.62068     | 270              | 0.90542     |
| 22                 | 0.00032119 | 995.7              | 8.42       | 2284               | 1270             | 0.6061      | 294              | 0.89696     |
| 27                 | 0.00036018 | 1331               | 17.5       | 1297               | 1170             | 0.62124     | 295              | 0.95247     |
| 34                 | 0.00056341 | 2151               | 11.4       | 1629               | 432              | 0.64165     | 93.1             | 1.328       |

**Table S7** | Values of EC components of Sample 4.

| $C_{PGNP}$ (mg/mL) | $\chi^2$ | $R_s$ ( $\Omega$ ) | $C_1$ (pF) | $R_1$ ( $\Omega$ ) | $CPE_{1-T}$ (mF) | $CPE_{1-P}$ |
|--------------------|----------|--------------------|------------|--------------------|------------------|-------------|
| 0                  | 0.017947 | 5883               | 2.55       | 2.39E+06           | 72.7             | 0.66394     |
| 0.96               | 0.01624  | 5383               | 2.85       | 5.32E+05           | 104              | 0.72209     |
| 3.2                | 0.008573 | 2554               | 3.49       | 1.60E+05           | 178              | 0.72056     |
| 5.3                | 0.006084 | 3211               | 3.57       | 1.06E+05           | 202              | 0.72383     |
| 8.8                | 0.004707 | 3273               | 3.21       | 92851              | 176              | 0.7197      |
| 11                 | 0.00712  | 4839               | 2.80       | 1.03E+05           | 130              | 0.70236     |

---

|    |          |      |      |       |     |         |
|----|----------|------|------|-------|-----|---------|
| 14 | 0.010628 | 6028 | 2.76 | 96854 | 151 | 0.71317 |
| 17 | 0.009092 | 5192 | 3.13 | 62493 | 186 | 0.72159 |
| 21 | 0.002509 | 3341 | 3.65 | 39740 | 247 | 0.7207  |
| 26 | 0.004676 | 4742 | 3.05 | 50418 | 184 | 0.72065 |

---
